# Supplementary material for: Emergency department visits during an Olympic gold medal television broadcast
Source: PubMed Central journal article supplement — Open Med. 2011 Jun 14;5(2):e112–9. (PMC3148000), 2011-06-14
Supplement: OpenMed-05-e112-s001.pdf [file OpenMed-05-e112-s001.pdf]

**Appendix A: Top 100 most common main diagnoses**

|                                                      | ICD10 code | Total patients * | Broadcast group † | Control group † | Odds ratio § | 95% confidence interval |
|------------------------------------------------------|------------|------------------|-------------------|-----------------|--------------|-------------------------|
| <b>ESTIMATED RATIO EXCLUDES EQUALITY</b>             |            |                  |                   |                 |              |                         |
| Abdominal and pelvic pain                            | R10        | 608              | 3.14              | 3.88            | 0.67         | 0.52–0.88               |
| Diarrhea, gastroenteritis presumed infectious origin | A09        | 375              | 1.44              | 2.46            | 0.48         | 0.34–0.72               |
| Dorsalgia                                            | M54        | 251              | 1.24              | 1.61            | 0.63         | 0.43–0.98               |
| Fracture of forearm                                  | S52        | 203              | 0.77              | 1.33            | 0.48         | 0.29–0.83               |
| Other medical care                                   | Z51        | 187              | 0.72              | 1.23            | 0.49         | 0.29–0.86               |
| Dislocate, sprain, strain of joints at foot          | S93        | 137              | 0.52              | 0.90            | 0.47         | 0.26–0.93               |
| Other surgical follow-up care                        | Z48        | 132              | 0.46              | 0.87            | 0.44         | 0.24–0.89               |
| Other joint disorders, not elsewhere classified      | M25        | 109              | 0.41              | 0.72            | 0.48         | 0.25–1.00               |
| Superficial injury of head                           | S00        | 108              | 1.29              | 0.59            | 1.81         | 1.18–2.85               |
| Bronchitis, not specified as acute or chronic        | J40        | 86               | 0.26              | 0.57            | 0.37         | 0.17–0.96               |
| Acute obstructive laryngitis [croup] or epiglottitis | J05        | 51               | 0.05              | 0.35            | 0.12         | 0.04–0.90               |
| <b>ESTIMATED RATIO OVERLAPS EQUALITY</b>             |            |                  |                   |                 |              |                         |
| Acute upper respiratory infection                    | J06        | 535              | 3.55              | 3.30            | 0.89         | 0.69–1.15               |
| Pain in throat and chest                             | R07        | 464              | 3.40              | 2.82            | 0.99         | 0.77–1.30               |
| Suppurative and unspecified otitis media             | H66        | 379              | 2.47              | 2.35            | 0.87         | 0.65–1.19               |
| Open wound of wrist and hand                         | S61        | 366              | 2.42              | 2.26            | 0.88         | 0.66–1.21               |
| Other disorders of urinary system                    | N39        | 356              | 2.06              | 2.24            | 0.76         | 0.55–1.06               |
| Open wound of head                                   | S01        | 325              | 2.22              | 2.00            | 0.91         | 0.67–1.27               |
| Pneumonia, organism unspecified                      | J18        | 292              | 1.70              | 1.84            | 0.76         | 0.54–1.11               |
| Acute pharyngitis                                    | J02        | 286              | 2.27              | 1.72            | 1.09         | 0.80–1.52               |
| Other and unspecified injuries of head               | S09        | 222              | 1.44              | 1.38            | 0.87         | 0.59–1.30               |
| Cellulitis                                           | L03        | 213              | 1.70              | 1.28            | 1.10         | 0.77–1.61               |
| Viral infection of unspecified site                  | B34        | 183              | 1.18              | 1.13            | 0.86         | 0.57–1.35               |
| Other miscellaneous soft tissue disorders            | M79        | 179              | 1.24              | 1.10            | 0.93         | 0.62–1.45               |
| Asthma                                               | J45        | 154              | 0.93              | 0.96            | 0.79         | 0.50–1.32               |
| Nausea and vomiting                                  | R11        | 152              | 0.72              | 0.98            | 0.61         | 0.37–1.08               |
| Headache                                             | R51        | 150              | 1.39              | 0.87            | 1.32         | 0.88–2.02               |
| Fever of unknown origin                              | R50        | 148              | 0.77              | 0.94            | 0.68         | 0.41–1.18               |
| Fracture at wrist and hand level                     | S62        | 148              | 0.67              | 0.96            | 0.58         | 0.34–1.05               |
| Fracture of lower leg, including ankle               | S82        | 140              | 0.93              | 0.87            | 0.89         | 0.56–1.48               |
| Superficial injury of wrist and hand                 | S60        | 137              | 0.88              | 0.85            | 0.85         | 0.53–1.44               |
| Dizziness and giddiness                              | R42        | 132              | 1.18              | 0.77            | 1.27         | 0.82–2.01               |
| Other functional intestinal disorders                | K59        | 123              | 0.62              | 0.79            | 0.65         | 0.37–1.21               |
| Other anxiety disorders                              | F41        | 120              | 0.93              | 0.72            | 1.06         | 0.66–1.78               |
| Cough                                                | R05        | 114              | 0.67              | 0.72            | 0.77         | 0.45–1.41               |
| Abnormalities of breathing                           | R06        | 114              | 0.93              | 0.68            | 1.13         | 0.70–1.89               |
| Miscellaneous complications of procedures            | T81        | 107              | 0.67              | 0.67            | 0.83         | 0.48–1.52               |
| Superficial injury of ankle and foot                 | S90        | 104              | 0.46              | 0.67            | 0.57         | 0.31–1.16               |
| Syncope and collapse                                 | R55        | 101              | 0.88              | 0.60            | 1.21         | 0.74–2.08               |
| Other chronic obstructive pulmonary disease          | J44        | 95               | 0.82              | 0.56            | 1.22         | 0.73–2.12               |
| Malaise and fatigue                                  | R53        | 94               | 0.57              | 0.59            | 0.80         | 0.45–1.53               |
| Migraine                                             | G43        | 92               | 0.62              | 0.57            | 0.90         | 0.51–1.69               |
| Dislocate, sprain, strain of joints at hand          | S63        | 92               | 0.52              | 0.58            | 0.73         | 0.40–1.45               |

| <b>Appendix A cont'd</b>                          |                   |                         |                         |                        |                     |                                |
|---------------------------------------------------|-------------------|-------------------------|-------------------------|------------------------|---------------------|--------------------------------|
|                                                   | <b>ICD10 code</b> | <b>Total patients *</b> | <b>Exposure group †</b> | <b>Control group †</b> | <b>Odds ratio §</b> | <b>95% confidence interval</b> |
| Dislocate, sprain, strain of joints of knee       | S83               | 87                      | 0.72                    | 0.52                   | 1.15                | 0.67–2.08                      |
| Diseases of pulp and periapical tissues           | K04               | 86                      | 0.62                    | 0.52                   | 0.97                | 0.55–1.83                      |
| Mental, behavioural disorders due to alcohol      | F10               | 84                      | 0.82                    | 0.48                   | 1.41                | 0.84–2.47                      |
| Adverse effects, not elsewhere classified         | T78               | 84                      | 0.77                    | 0.49                   | 1.30                | 0.77–2.32                      |
| Essential (primary) hypertension                  | I10               | 82                      | 0.36                    | 0.53                   | 0.56                | 0.28–1.26                      |
| Acute bronchiolitis                               | J21               | 82                      | 0.88                    | 0.46                   | 1.57                | 0.95–2.72                      |
| Fracture of shoulder and upper arm                | S42               | 82                      | 0.41                    | 0.52                   | 0.65                | 0.34–1.39                      |
| Haemorrhage in early pregnancy                    | O20               | 81                      | 0.52                    | 0.50                   | 0.85                | 0.46–1.68                      |
| Conjunctivitis                                    | H10               | 79                      | 0.36                    | 0.51                   | 0.58                | 0.29–1.32                      |
| Dislocate, sprain, strain of joints at shoulder   | S43               | 79                      | 0.57                    | 0.48                   | 0.97                | 0.54–1.88                      |
| Superficial injury of thorax                      | S20               | 76                      | 0.36                    | 0.49                   | 0.61                | 0.30–1.38                      |
| Intracranial injury                               | S06               | 75                      | 0.26                    | 0.50                   | 0.43                | 0.20–1.11                      |
| Depressive episode                                | F32               | 73                      | 0.62                    | 0.43                   | 1.18                | 0.66–2.24                      |
| Superficial injury of lower leg                   | S80               | 73                      | 0.31                    | 0.48                   | 0.54                | 0.26–1.29                      |
| Unspecified renal colic                           | N23               | 72                      | 0.41                    | 0.45                   | 0.75                | 0.39–1.62                      |
| Rash and other nonspecific skin eruption          | R21               | 72                      | 0.62                    | 0.43                   | 1.20                | 0.67–2.28                      |
| Health services encounter in other circumstances  | Z76               | 72                      | 0.31                    | 0.47                   | 0.55                | 0.26–1.31                      |
| Convulsions, not elsewhere classified             | R56               | 69                      | 0.52                    | 0.42                   | 1.02                | 0.55–2.04                      |
| Fracture of foot, except ankle                    | S92               | 69                      | 0.31                    | 0.45                   | 0.57                | 0.27–1.38                      |
| Injury of eye and orbit                           | S05               | 68                      | 0.31                    | 0.44                   | 0.58                | 0.28–1.40                      |
| Abnormalities of heart beat                       | R00               | 67                      | 0.31                    | 0.43                   | 0.59                | 0.28–1.42                      |
| Heart failure                                     | I50               | 66                      | 0.36                    | 0.42                   | 0.71                | 0.35–1.62                      |
| Chronic sinusitis                                 | J32               | 63                      | 0.26                    | 0.41                   | 0.52                | 0.24–1.35                      |
| Other and unspecified injuries of wrist and hand  | S69               | 61                      | 0.26                    | 0.40                   | 0.54                | 0.24–1.40                      |
| Cutaneous abscess, furuncle and carbuncle         | L02               | 60                      | 0.26                    | 0.39                   | 0.55                | 0.25–1.43                      |
| Viral and other specified intestinal infections   | A08               | 55                      | 0.36                    | 0.34                   | 0.88                | 0.43–2.00                      |
| Acute bronchitis                                  | J20               | 55                      | 0.21                    | 0.36                   | 0.47                | 0.20–1.37                      |
| Gastro-oesophageal reflux disease                 | K21               | 55                      | 0.46                    | 0.33                   | 1.17                | 0.61–2.46                      |
| Other diseases of digestive system                | K92               | 55                      | 0.26                    | 0.35                   | 0.60                | 0.27–1.58                      |
| Urticaria                                         | L50               | 55                      | 0.26                    | 0.35                   | 0.60                | 0.27–1.58                      |
| Otalgia and effusion of ear                       | H92               | 54                      | 0.57                    | 0.30                   | 1.53                | 0.83–3.04                      |
| Atrial fibrillation and flutter                   | I48               | 53                      | 0.36                    | 0.33                   | 0.91                | 0.45–2.09                      |
| Other and unspecified injuries of ankle and foot  | S99               | 53                      | 0.26                    | 0.34                   | 0.63                | 0.28–1.64                      |
| Other disorders of teeth or supporting structures | K08               | 52                      | 0.36                    | 0.32                   | 0.93                | 0.46–2.14                      |
| Haemorrhage from respiratory passages             | R04               | 52                      | 0.26                    | 0.33                   | 0.64                | 0.29–1.68                      |
| Swelling, mass, lump in skin                      | R22               | 50                      | 0.26                    | 0.32                   | 0.67                | 0.30–1.76                      |
| Reaction to stress and adjustment disorders       | F43               | 49                      | 0.31                    | 0.30                   | 0.84                | 0.39–2.04                      |
| Stroke, not specified haemorrhage or infarction   | I64               | 49                      | 0.36                    | 0.30                   | 1.00                | 0.49–2.30                      |
| Acute tonsillitis                                 | J03               | 49                      | 0.15                    | 0.33                   | 0.39                | 0.15–1.34                      |
| Open wound of lower leg                           | S81               | 49                      | 0.15                    | 0.33                   | 0.39                | 0.15–1.34                      |
| Superficial injury of abdomen, lower back, pelvis | S30               | 48                      | 0.36                    | 0.29                   | 1.02                | 0.50–2.36                      |
| Superficial injury of forearm                     | S50               | 48                      | 0.31                    | 0.30                   | 0.86                | 0.40–2.09                      |
| Health services visit for other medical advice    | Z71               | 48                      | 0.46                    | 0.28                   | 1.38                | 0.71–2.93                      |
| Phlebitis and thrombophlebitis                    | I80               | 47                      | 0.31                    | 0.29                   | 0.88                | 0.41–2.15                      |
| Other disorders of muscle                         | M62               | 46                      | 0.36                    | 0.28                   | 1.08                | 0.52–2.49                      |
| Fracture of femur                                 | S72               | 46                      | 0.52                    | 0.26                   | 1.67                | 0.87–3.43                      |

| <b>Appendix A cont'd</b>                     |                   |                         |                         |                        |                     |                                |
|----------------------------------------------|-------------------|-------------------------|-------------------------|------------------------|---------------------|--------------------------------|
|                                              | <b>ICD10 code</b> | <b>Total patients *</b> | <b>Exposure group †</b> | <b>Control group †</b> | <b>Odds ratio §</b> | <b>95% confidence interval</b> |
| Follow-up for conditions other than cancer   | Z09               | 46                      | 0.46                    | 0.26                   | 1.46                | 0.75–3.10                      |
| Other and unspecified injuries of lower leg  | S89               | 45                      | 0.31                    | 0.28                   | 0.92                | 0.43–2.26                      |
| Otitis externa                               | H60               | 44                      | 0.31                    | 0.27                   | 0.95                | 0.44–2.33                      |
| Acute sinusitis                              | J01               | 44                      | 0.26                    | 0.28                   | 0.77                | 0.34–2.04                      |
| Open wound of ankle and foot                 | S91               | 44                      | 0.31                    | 0.27                   | 0.95                | 0.44–2.33                      |
| Other respiratory disorders                  | J98               | 43                      | 0.31                    | 0.26                   | 0.97                | 0.45–2.39                      |
| Symptoms and signs involving emotional state | R45               | 43                      | 0.26                    | 0.27                   | 0.79                | 0.35–2.09                      |
| Superficial injury of shoulder and upper arm | S40               | 43                      | 0.15                    | 0.28                   | 0.45                | 0.17–1.55                      |
| Zoster [herpes zoster]                       | B02               | 42                      | 0.31                    | 0.26                   | 1.00                | 0.46–2.46                      |
| Disorders of vestibular function             | H81               | 42                      | 0.21                    | 0.27                   | 0.63                | 0.26–1.86                      |
| Other abnormal uterine and vaginal bleeding  | N93               | 42                      | 0.05                    | 0.29                   | 0.15                | 0.04–1.11                      |
| Cholelithiasis                               | K80               | 41                      | 0.21                    | 0.26                   | 0.65                | 0.27–1.91                      |

Sections are sequenced by declining numbers of total patients.

\* Denotes total patients on event day and control days combined.

† Denotes proportion of corresponding group, expressed as percentage.

§ Denotes relative frequency comparing event day with control days.
