# Supplementary material for: Emergency department visits during an Olympic gold medal television broadcast
Source: PubMed Central journal article supplement — Open Med. 2011 Jun 14;5(2):e112–9. (PMC3148000), 2011-06-14
Supplement: OpenMed-05-e112-s002.pdf [file OpenMed-05-e112-s002.pdf]

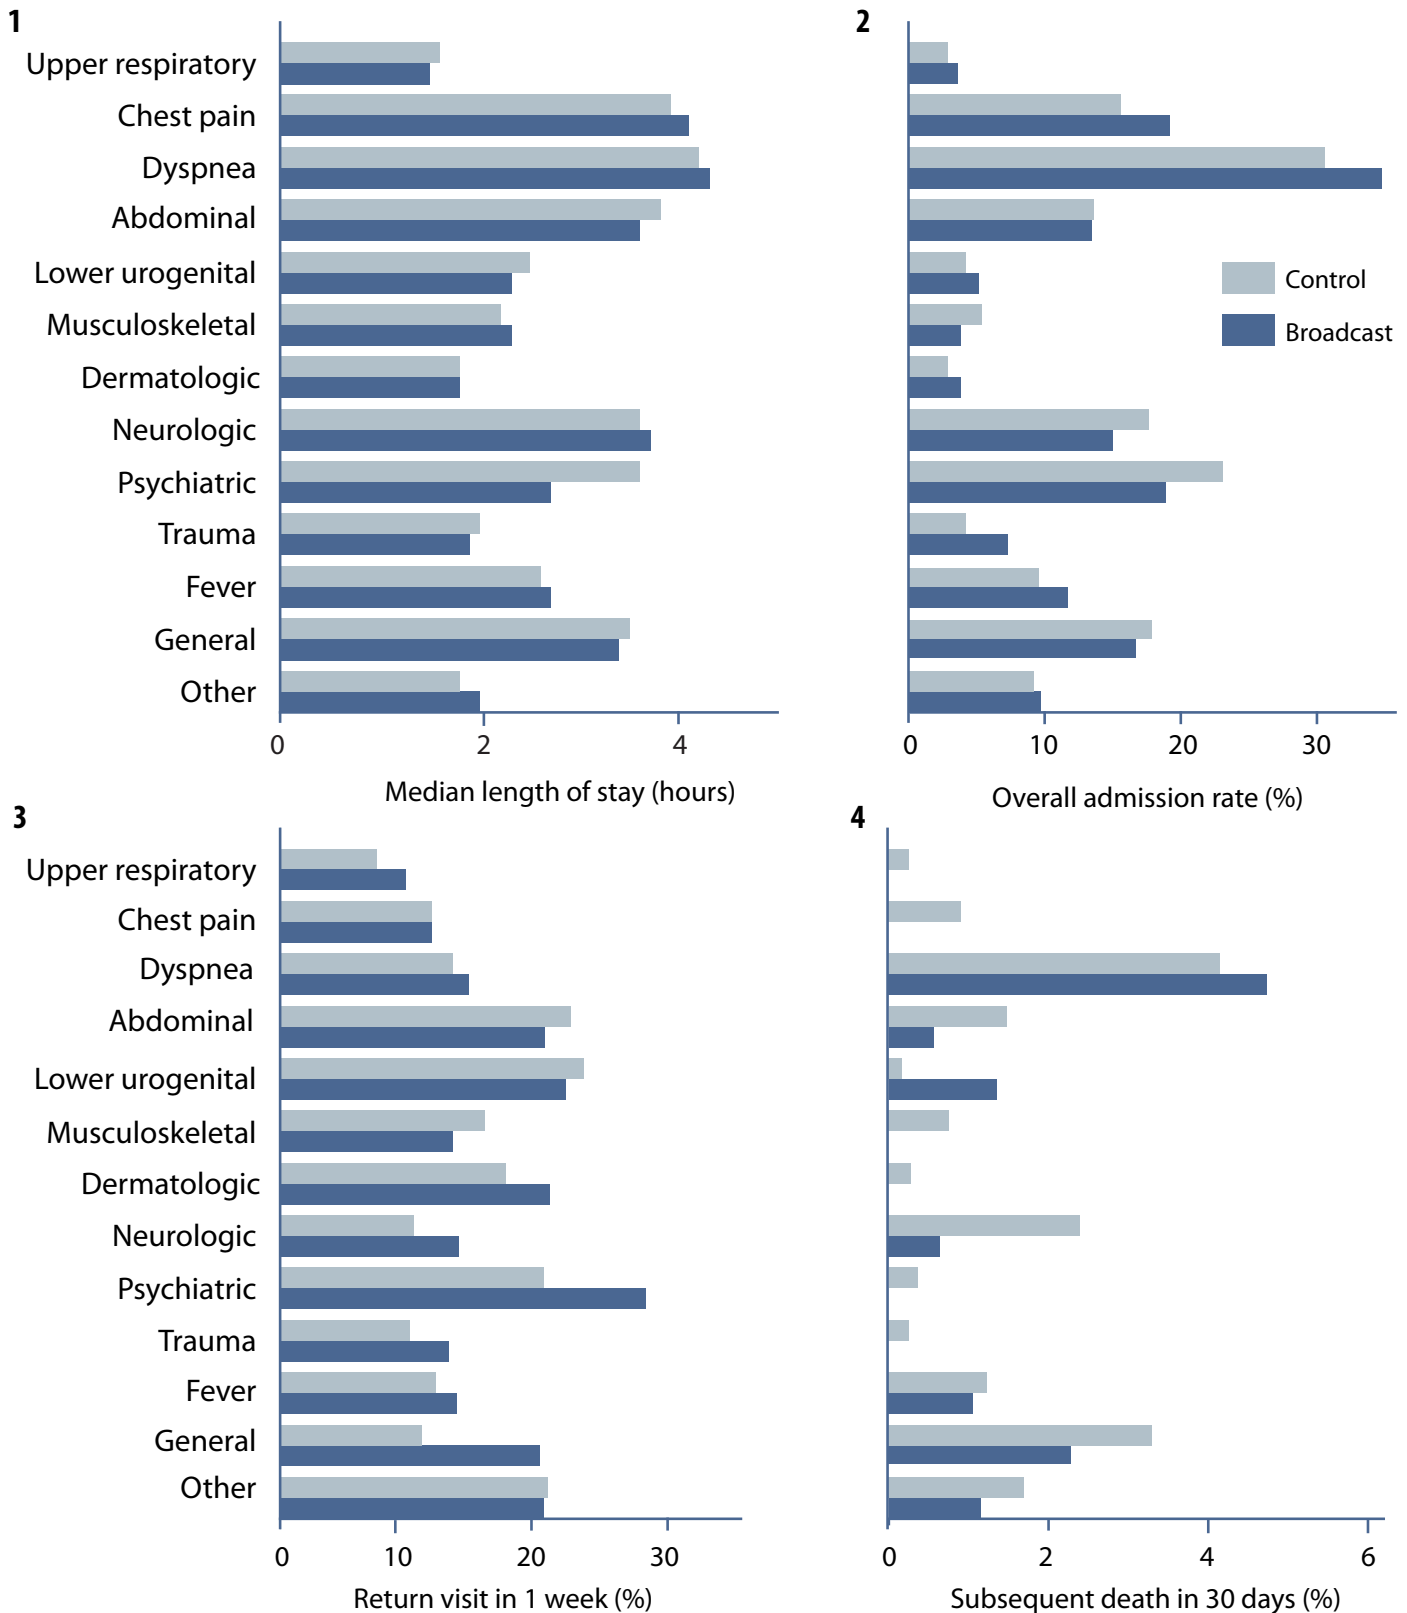

**Appendix B: Overview of process and outcomes by patient chief complaint.** Bar graphs comparing distribution of patients visiting emergency department during broadcast hours (light bar) and during the same hours on the control days (dark bar). Each analysis was stratified according to chief complaint. Data are shown for median length of stay (panel 1), overall admission rates (panel 2), rates of return visit within 1 week after visit (panel 3), and rate of death within 30 days after visit (panel 4). The results show no significant difference between the groups on any of the 4 measures.
